# Supplementary material
Source: PubMed Central journal article supplement (PMC5462489)
Supplement: mp7b00308_si_001.pdf [file mp7b00308_si_001.pdf]

## ***Supporting Information***

### **Cetuximab prevents methotrexate-induced cytotoxicity *in vitro*, through epidermal growth factor dependent regulation of renal drug transporters**

Pedro Caetano-Pinto<sup>1</sup>, Amer Jamalpoor<sup>1</sup>, Janneke Ham<sup>2</sup>, Anastasia Goumenou<sup>1</sup>, Monique Mommersteeg<sup>3</sup>, Dirk Pijnenburg<sup>3</sup>, Rob Ruijtenbeek<sup>3</sup>, Natalia Sanchez-Romero<sup>1,4</sup>, Bertrand van Zelst<sup>5</sup>, Sandra Heil<sup>5</sup>, Jitske Jansen<sup>1</sup>, Martijn J. Wilmer<sup>6</sup>, Carla M.L. van Herpen<sup>2</sup> and Rosalinde Masereeuw<sup>1</sup>

<sup>1</sup>Division of Pharmacology, Utrecht Institute for Pharmaceutical Sciences, Faculty of Science, Utrecht University, The Netherlands; <sup>2</sup>Department of Oncology, Radboud university medical center, Nijmegen, The Netherlands; <sup>3</sup>PamGene, 's-Hertogenbosch, The Netherlands; <sup>4</sup>Centro Investigación Biomédica de Aragón (CIBA), Zaragoza, Spain  
<sup>5</sup>Department of Clinical Chemistry, ErasmusMC, Rotterdam, The Netherlands;  
<sup>6</sup>Department of Pharmacology and Toxicology, Radboud Institute of Molecular Life Sciences, Radboudumc, Nijmegen, The Netherlands

**Table S1:** *ciPTEC culture medium formulation*

|                    |                         | Distributor     | Concentration |
|--------------------|-------------------------|-----------------|---------------|
| <b>Medium</b>      | DMEM-F12                | Thermo Fisher-  | -             |
|                    | HEPES, no phenol red    | Gibco           | -             |
|                    | Insulin                 | Sigma-Aldrich   | 5µg/ml        |
|                    | Transferrin             | Sigma-Aldrich   | 5µg/ml        |
|                    | Sodium                  | Sigma-Aldrich   | 5ng/ml        |
| <b>Supplements</b> | Hydrocortisone          | Sigma-Aldrich   | 36ng/ml       |
|                    | Epidermal growth factor | Sigma-Aldrich   | 10ng/ml       |
|                    | Tri-iodothyronine       | Sigma-Aldrich   | 40pg/ml       |
|                    | FCS                     | Greiner Bio-one | 10% (v/v)     |

**Table S2:** *Pathways identified as significant matches to the kinase phosphorylation sites obtained from the PTK/STK PamChip® array. The list of pathways was obtained based on statistical analysis of the phosphorylation targets and overlap with pathway targets retrieved from associated databases. Pathways with  $-\log(pvalue)$  above 4 were considered significant. Conditions: +EGF (orange); +EGF+CTX (blue); +CTX (red)*

| #  | Maps                                                                                     | 0   | 2   | 4   | 6   | $-\log(pvalue)$ |
|----|------------------------------------------------------------------------------------------|-----|-----|-----|-----|-----------------|
| 1  | Development c-Kit ligand signaling pathway during hemopoiesis                            | 0.5 | 1.5 | 3.5 | 6.5 | 6.5             |
| 2  | Development growth factors in regulation of oligodendrocyte precursor cell proliferation | 0.5 | 1.5 | 3.5 | 6.5 | 6.5             |
| 3  | Immune response inhibitory PD-1 signaling in T-cells                                     | 0.5 | 1.5 | 3.5 | 6.5 | 6.5             |
| 4  | Role of $\alpha$ -6/ $\beta$ -4 integrins in carcinoma progression                       | 0.5 | 1.5 | 3.5 | 6.5 | 6.5             |
| 5  | Signal transduction PKA signaling                                                        | 0.5 | 1.5 | 3.5 | 6.5 | 6.5             |
| 6  | Oxidative stress activation of NADPH                                                     | 0.5 | 1.5 | 3.5 | 6.5 | 6.5             |
| 7  | Development EGFR signaling pathway                                                       | 0.5 | 1.5 | 3.5 | 6.5 | 6.5             |
| 8  | Development gastrin in cell growth and proliferation                                     | 0.5 | 1.5 | 3.5 | 6.5 | 6.5             |
| 9  | Main growth factor signaling cascades in multiple myeloma cells                          | 0.5 | 1.5 | 3.5 | 6.5 | 6.5             |
| 10 | Development VEGF signaling via VEGFR2 – generic cascades                                 | 0.5 | 1.5 | 3.5 | 6.5 | 6.5             |

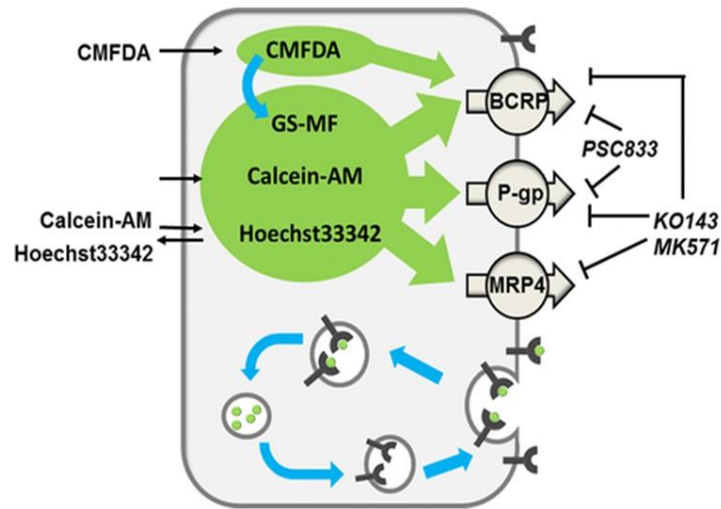

**Figure S1:** Graphic abstract of "Fluorescence-Based Transport Assays Revisited in a Human Renal Proximal Tubule Cell Line". The interactions of several fluorescent substrates and model inhibitors with the major apical drug transporters present in proximal tubule epithelial cells.

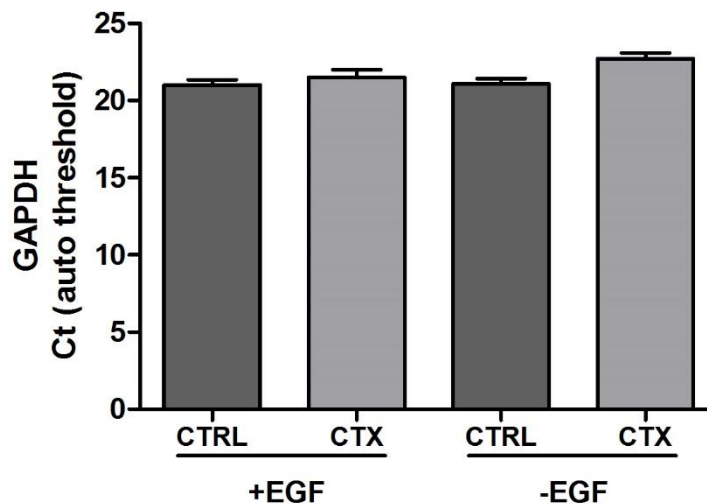

**Figure S2:** Cycle threshold (Ct) values for GAPDH in the different experimental conditions used in the present study. GAPDH expression was stable and no statistically significant differences were observed between the different treatments.

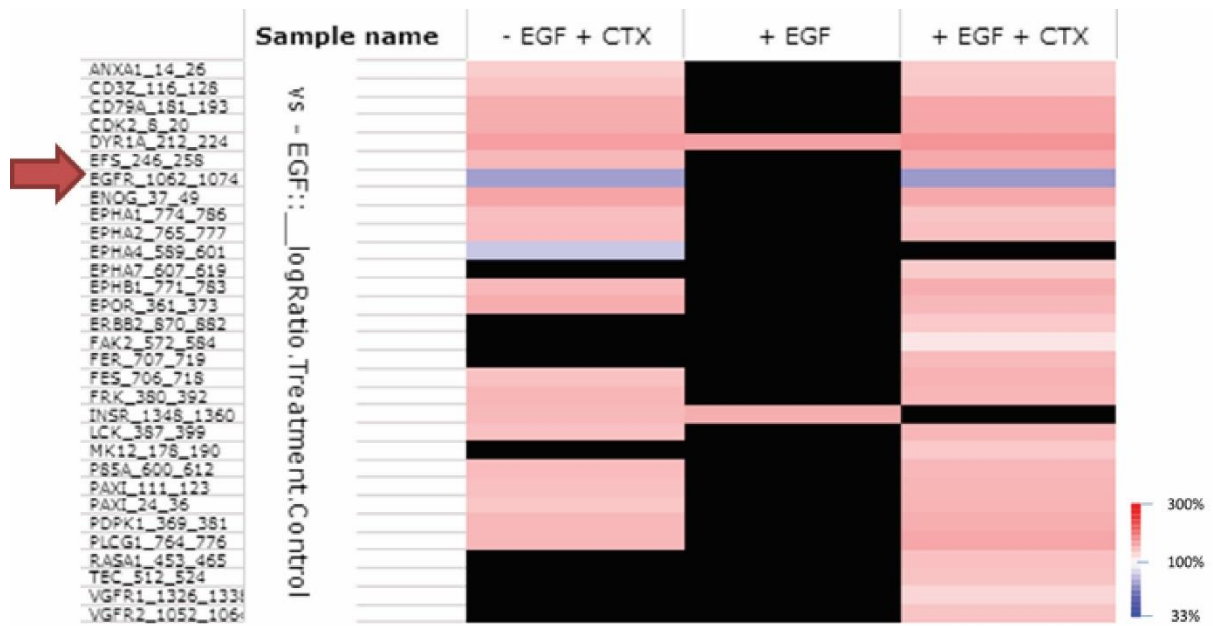

Figure S3: Cetuximab inhibition of the EGFR phosphosite.

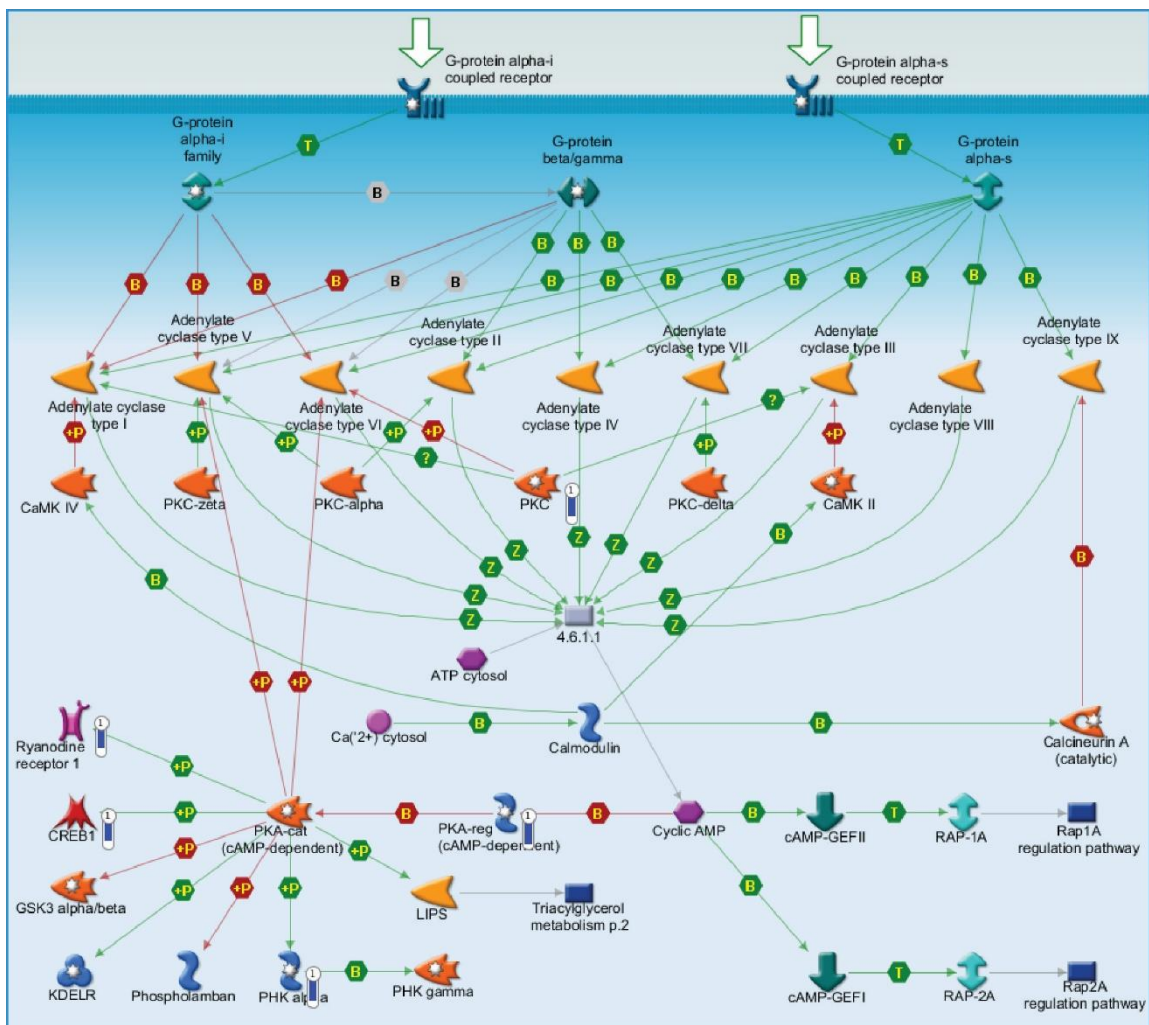

Figure S4: Metacore knowledge-based pathway analysis of the effect of EGF (control condition) on ciPTEC-OAT1

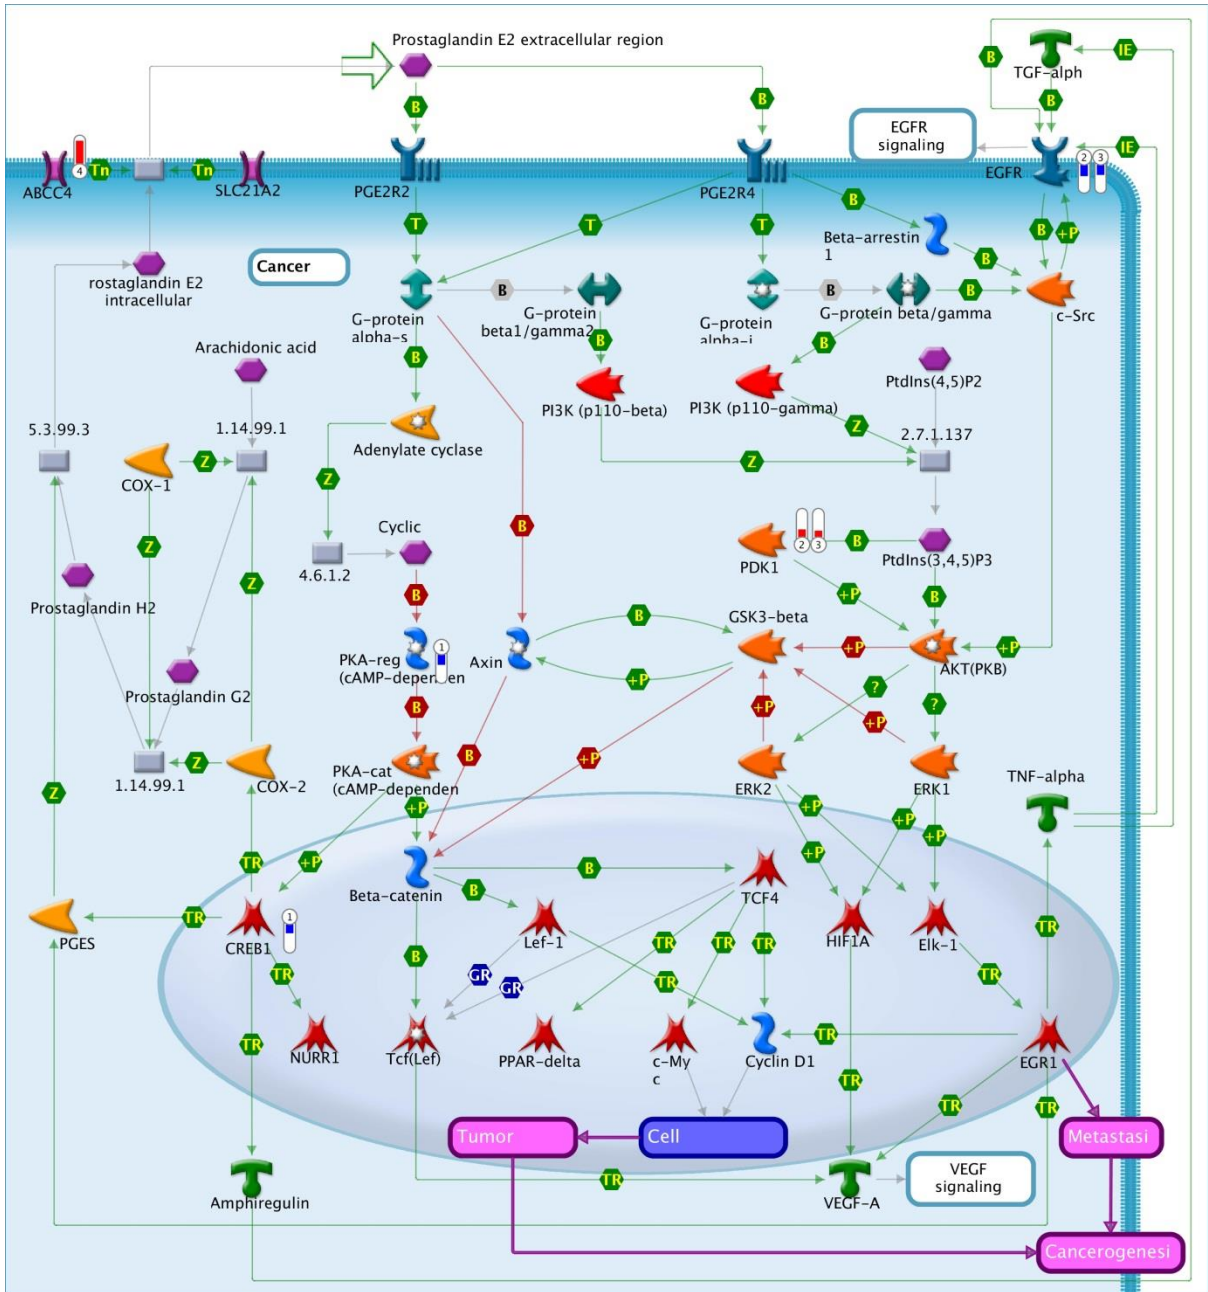

**Figure S5:** Metacore knowledge-based pathway analysis of the effect of EGF together with Cetuximab on ciPTEC-OAT1.

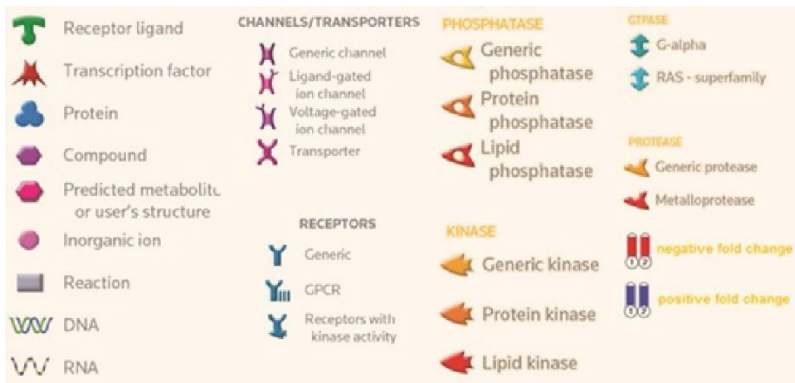

**Figure S6:** Pathway analysis symbols key
